# Supplementary material for: Obesity-associated, but not obesity-independent, tumors respond to insulin by increasing mitochondrial glucose oxidation
Source: PubMed Central journal article supplement (PMC6561592; doi:10.1371/journal.pone.0218126), 2019-06-12

# S1 Fig

## A

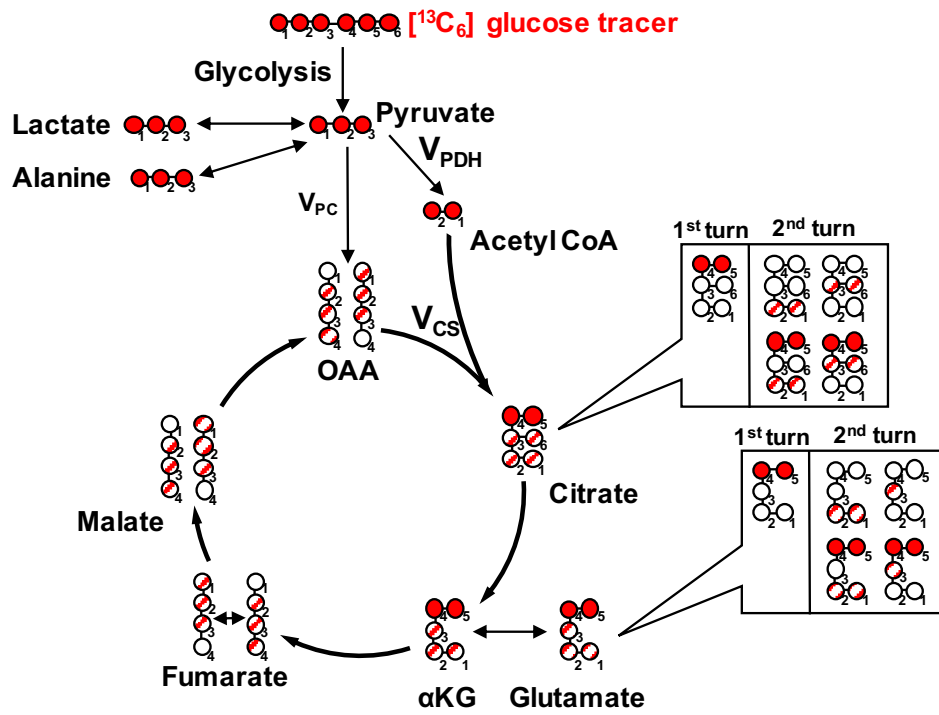

## B

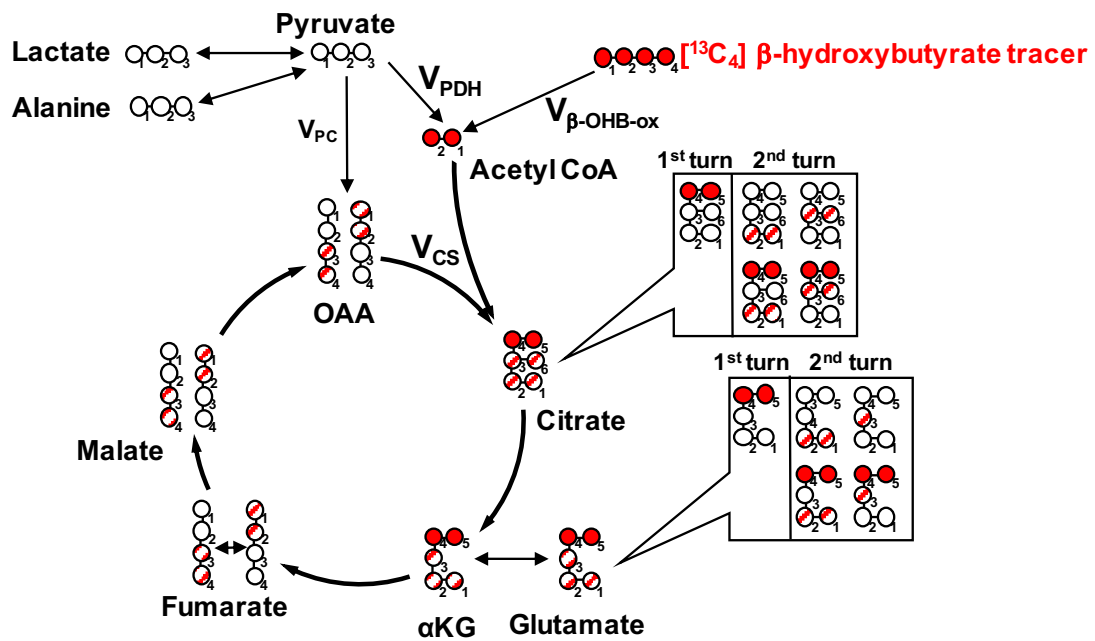

Supplement: pone.0218126.s001.pdf [file pone.0218126.s001.pdf]
